# Supplementary material for: An Algorithm for Finding Biologically Significant Features in Microarray Data Based on A Priori Manifold Learning
Source: PLOS journal article supplement (doi:10.1371/journal.pone.0090562), 2014-03-03
Supplement: S6 (10.1371/journal.pone.0090562.s006) [file journal.pone.0090562.s006]

## Supplementary Material 1 - The $\eta$ Value

We show how the  $\eta$  value improves the Dunn Index. The  $\eta$  value selected for the embedding of the Endometrial cancer was 19000. It is the value with the highest Dunn Index as shown in figure S1

**Figure S1. Endometrium Cancer:** How the  $\eta$  value affects the value for the Dunn Index
