# Supplementary material for: An Algorithm for Finding Biologically Significant Features in Microarray Data Based on A Priori Manifold Learning
Source: PLOS journal article supplement (doi:10.1371/journal.pone.0090562), 2014-03-03
Supplement: S7 (10.1371/journal.pone.0090562.s007) [file journal.pone.0090562.s007]

## Supplementary Material 2 - Accuracy Variance

We present the error bars with one standard deviation of uncertainty for the 10-fold cross validation with a  $k$ -NN classifier in figure S1 for the sample-by-sample affinity matrix and in figure S2 for gene-by-gene affinity matrix. For Linear Discriminant Analysis the gene-by-gene errorbars are shown in figure S4 and for the sample-by-sample experiments in figure S3

□

**Figure S1. Accuracy with variance for all nine datasets for sample-by-sample affinity matrices using  $k$  Nearest Neighbours:**

Accuracy with variance calculated for *a priori* manifold learning (blue) compared with PCA (Green) and Isomap (Red) computed using the sample-by-sample affinity matrix and the  $k$ -NN classifier

□

**Figure S2. Accuracy with variance for all nine datasets for gene-by-gene affinity matrices  $k$  Nearest Neighbours:**

Accuracy with variance calculated for *a priori* manifold learning (blue) compared with PCA (Green) and Isomap (Red) computed using the gene-by-gene affinity matrix and the  $k$ -NN classifier

□

**Figure S3. Accuracy with variance for all nine datasets for sample-by-sample affinity matrices using Linear Discriminant Analysis:**

Accuracy with variance calculated for *a priori* manifold learning (blue) compared with PCA (Green) and Isomap (Red) computed using the sample-by-sample affinity matrix and the LDA classifier

□

**Figure S4. Accuracy with variance for all nine datasets for gene-by-gene affinity matrices using Linear Discriminant Analysis:**

Accuracy with variance calculated for *a priori* manifold learning (blue) compared with PCA (Green) and Isomap (Red) computed using the gene-by-gene affinity matrix and the LDA classifier
